# Supplementary material for: Human cytochrome P450 3A4 and a carbon nanofiber modified film electrode as a platform for the simple evaluation of drug metabolism and inhibition reactions
Source: Royal Society of Chemistry journal article supplement (doi:10.1039/c3an01313h), 2013-01-01
Supplement: c3an01313h.pdf [file c3an01313h.pdf]

## Supporting Information

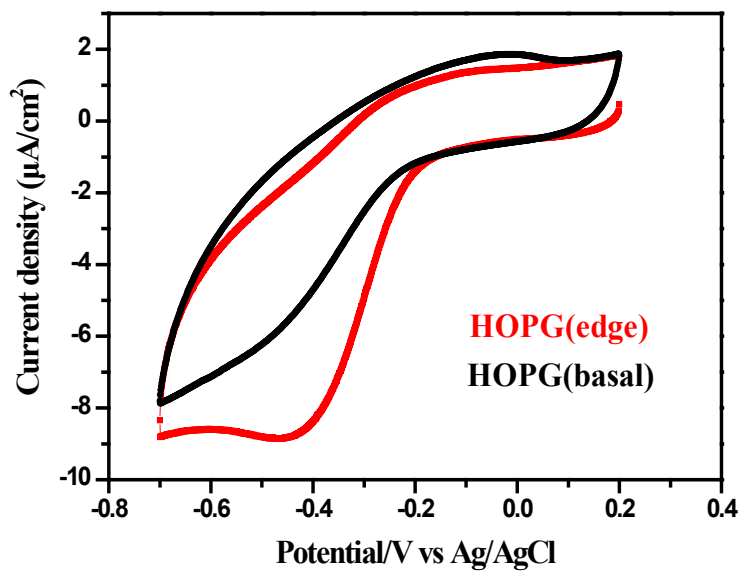

**Fig. S1** Electrocatalytic performance of CYP3A4 modified HOPG (basal and edge plane) electrodes. Scan rate: 20 mV/s; PB solution (0.1 M, pH 7.0).

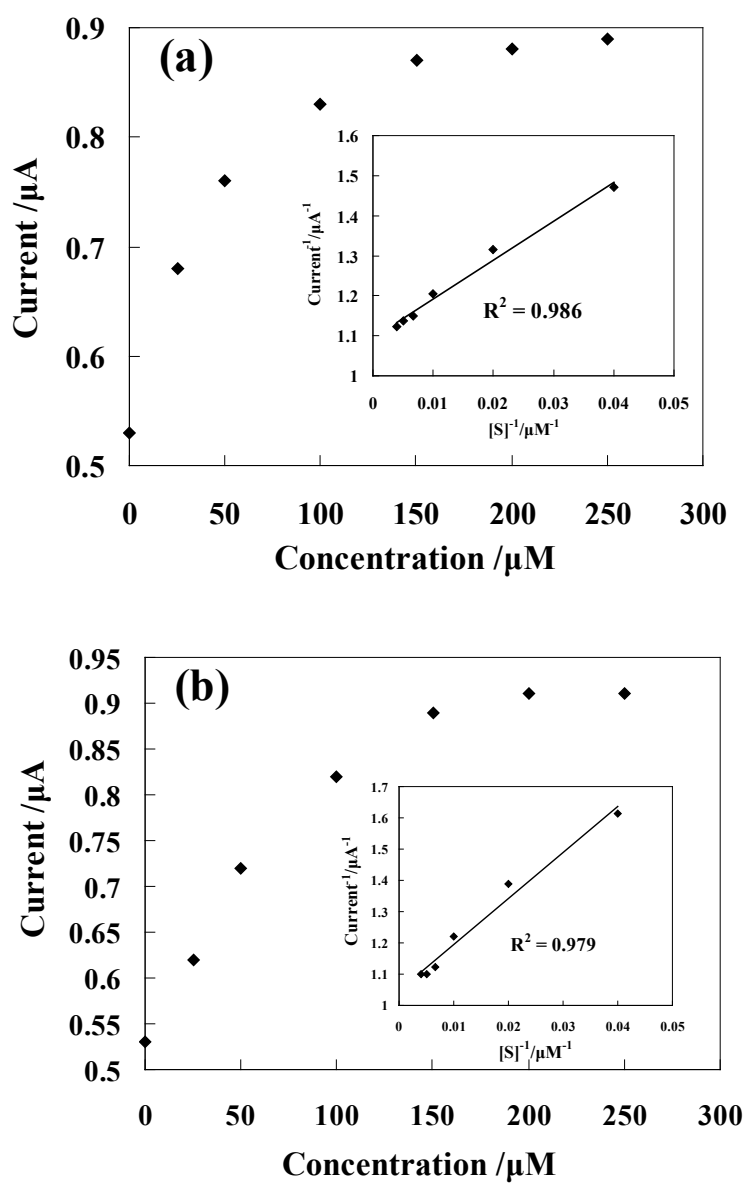

**Fig. S2** Calibration plots illustrating the electrode response to testosterone (a) and quinidine (b) addition. Insert: double-reciprocal plot of catalytic current and the concentrations of substrates. Experimental conditions is same with that in Figure 5.

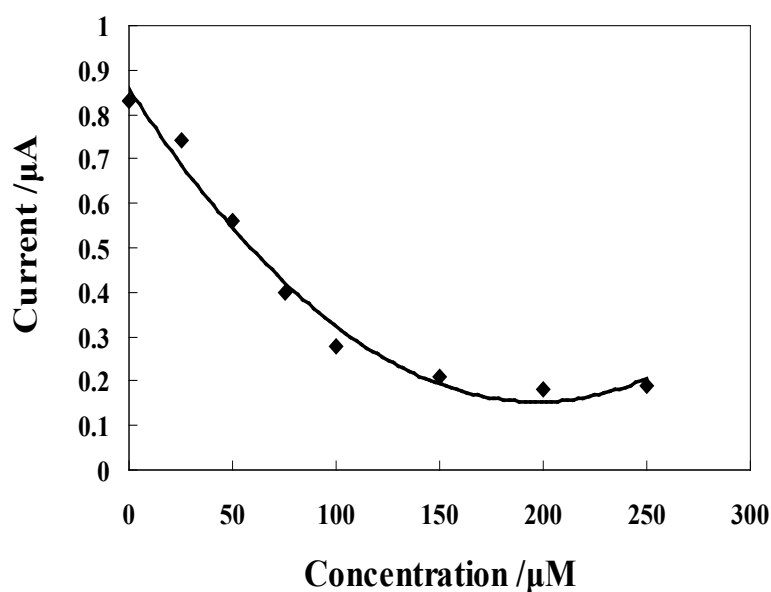

**Fig. S3** Bioelectrocatalytic current variation with the addition of increasing concentration of inhibitor ketoconazole. Experimental conditions is same with that in Figure 5.

The  $IC_{50}$  value was used to explore the detailed inhibition effects of ketoconazole on testosterone metabolism. Ketoconazole ranged from 0 to 250  $\mu\text{M}$  were gradually added into the PBS solution (pH 7.0) in the presence of constant testosterone concentration. Cyclic voltammetry was performed after each addition. The inhibition data followed a binomial model ( $Y = 2E-05X^2 - 0.0072 X + 0.8573$ ), and the  $IC_{50}$  value was calculated to be 58.5  $\mu\text{M}$ . The inhibition effect on testosterone metabolism was similar to a previous report (*J. Am. Chem. Soc.*, 2009, **131**, 6646-6647.).
